# Supplementary material for: Panax notoginseng saponins prevent dementia and oxidative stress in brains of SAMP8 mice by enhancing mitophagy
Source: PubMed Central journal article supplement (PMC10993618; doi:10.1186/s12906-024-04403-7), 2024-04-04

LC3

Raw Picture in Fig. 3E, the blue and red box position indicates the cutting position and both blots were running on the same gel.

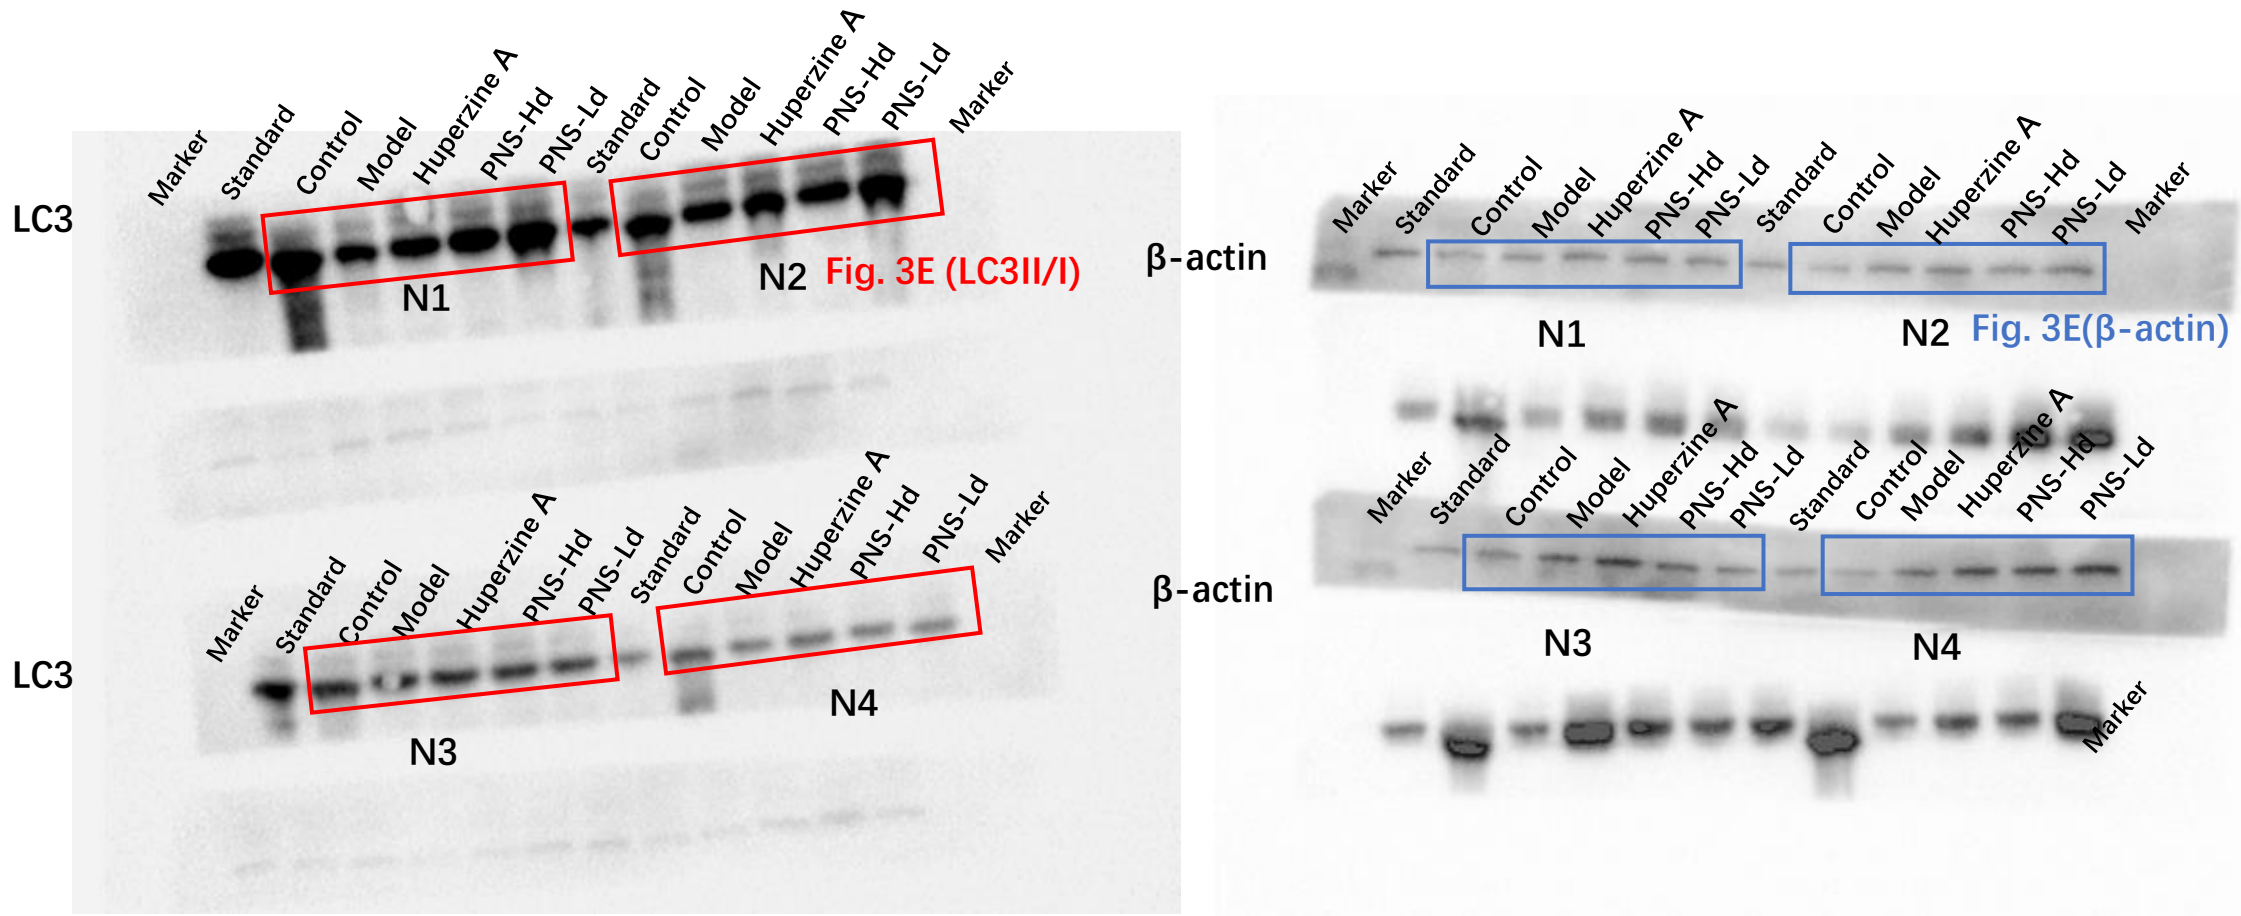

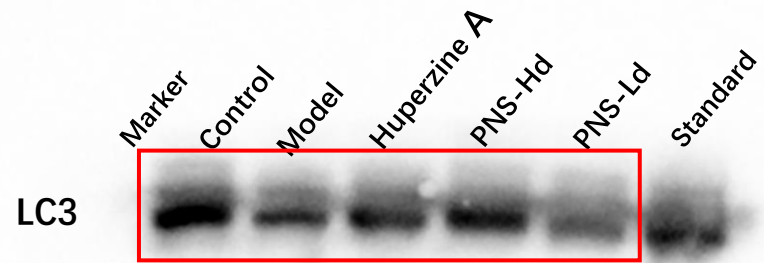

N5

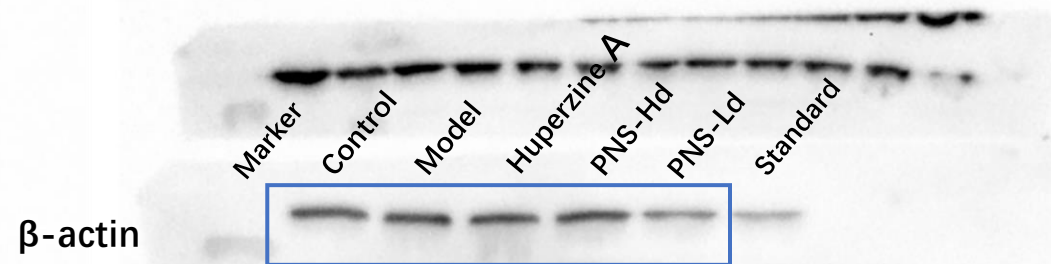

N5

Parkin

Raw Picture in Fig. 4E, the blue and red box position indicates the cutting position and both blots were running on the same gel.

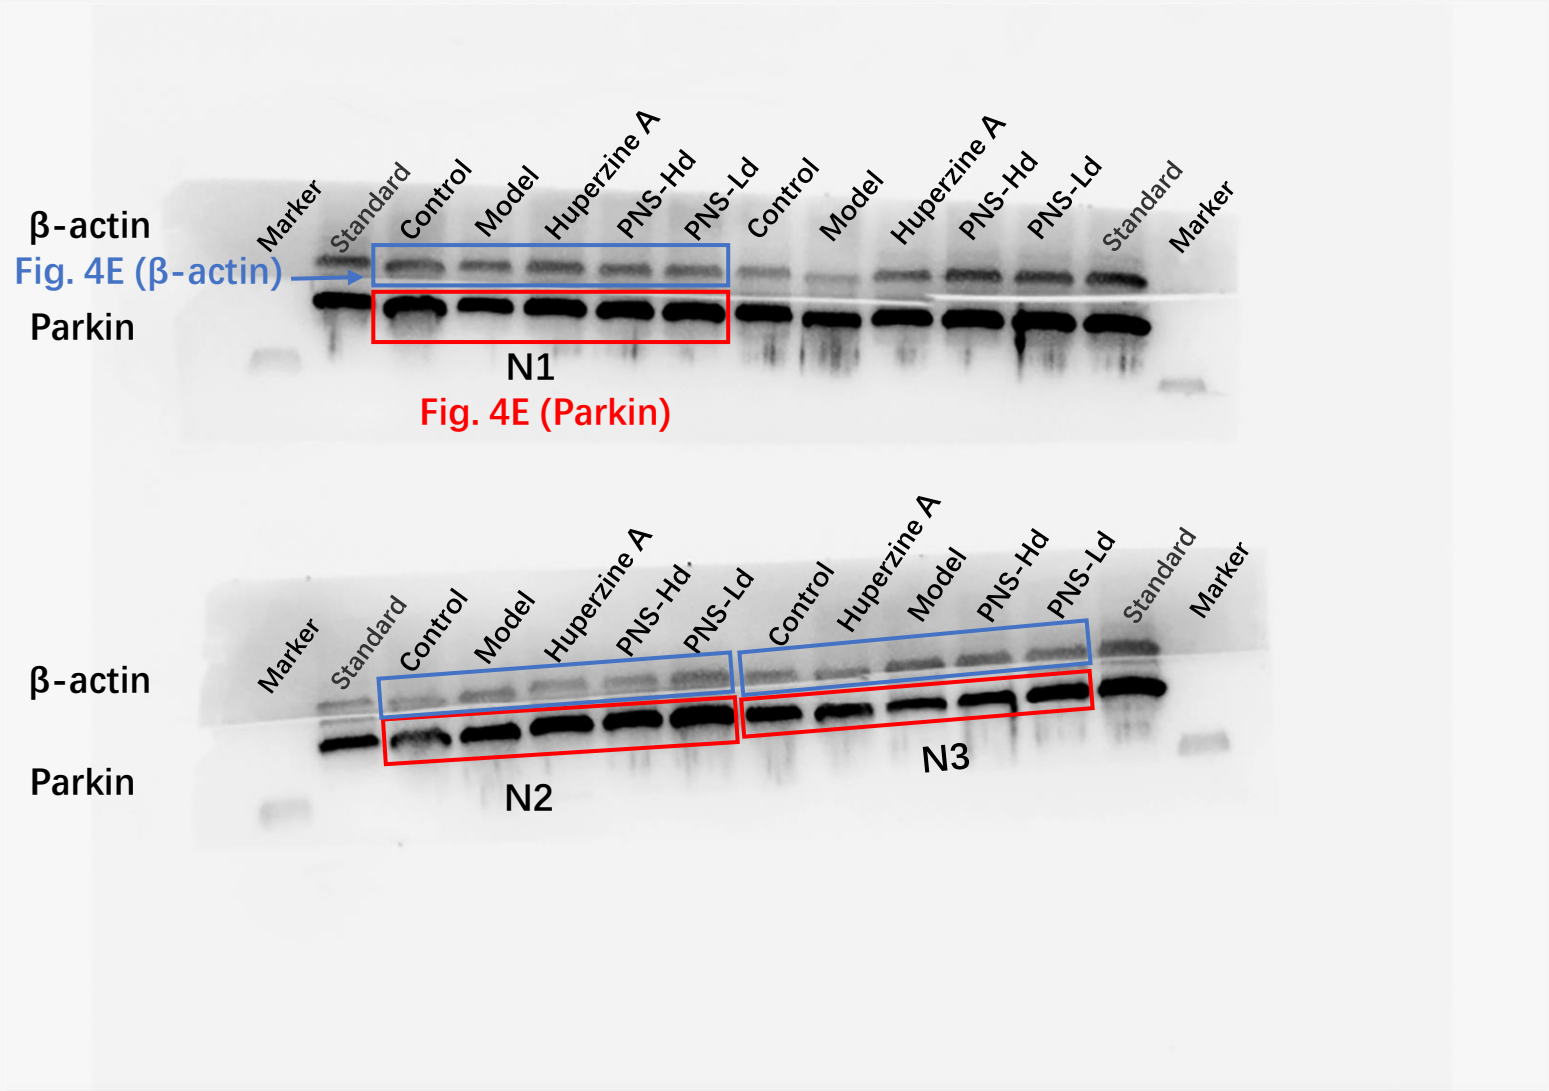

$\beta$ -actin

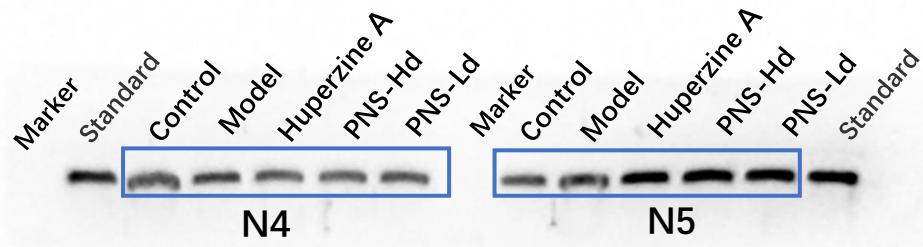

Parkin

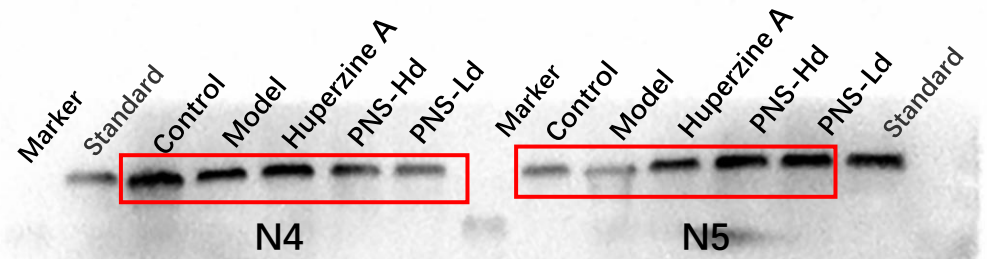

PINK 1

Raw Picture in Fig. 4E, the blue and red box position indicates the cutting position and both blots were running on the same gel.

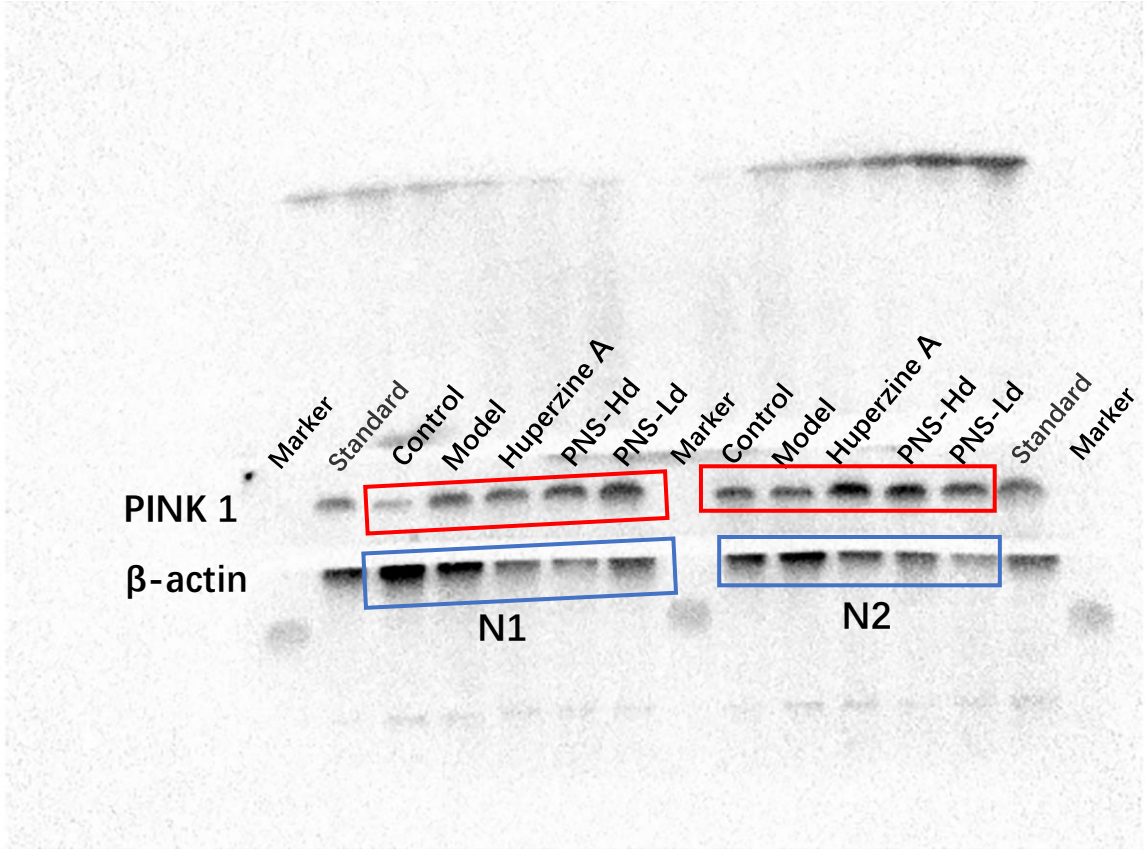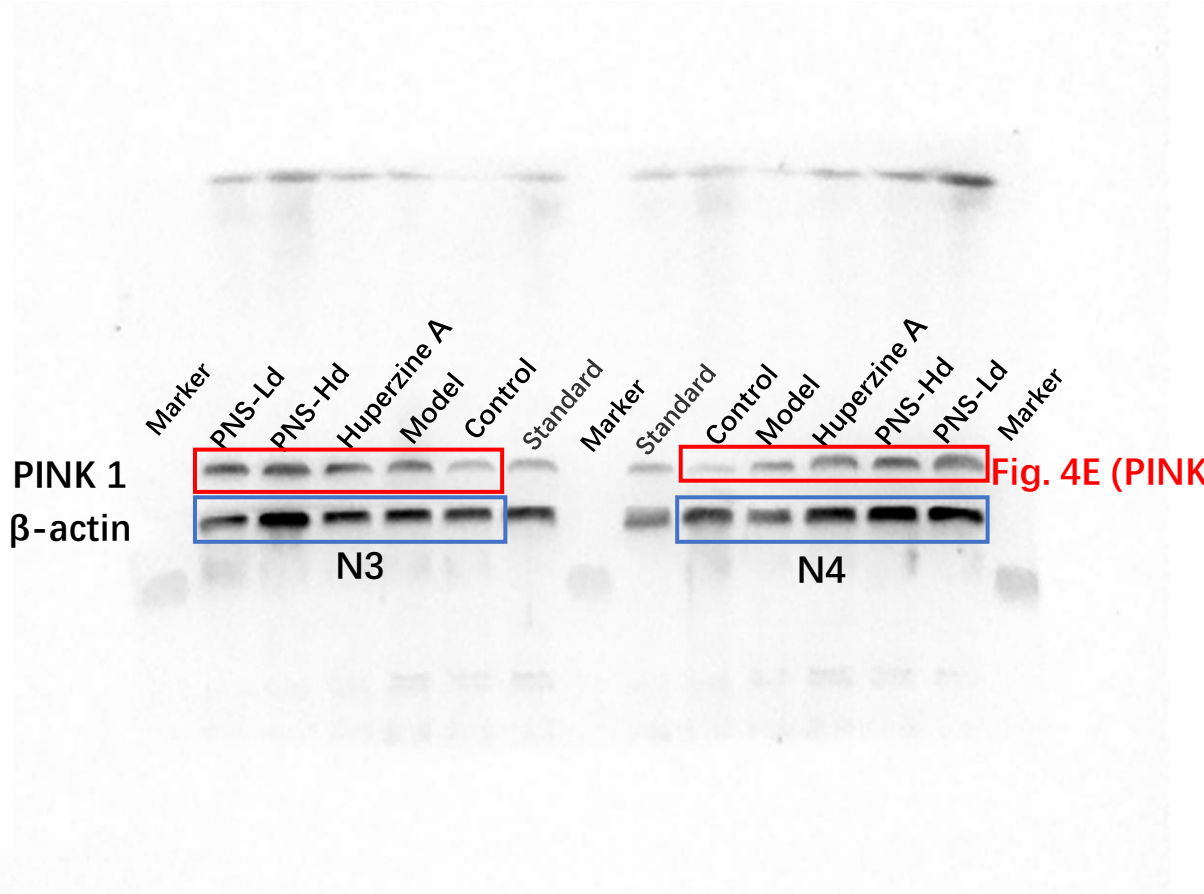





OPTN

Raw Picture in Fig. 4E, the blue and red box position indicates the cutting position and both blots were running on the same gel.

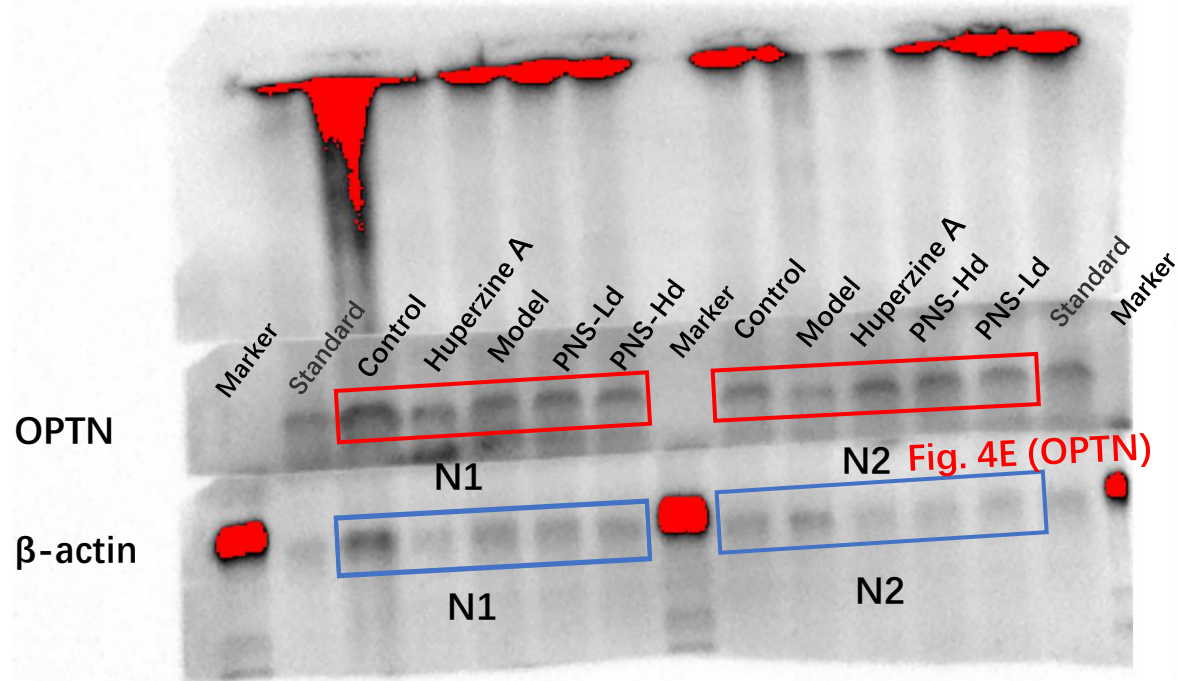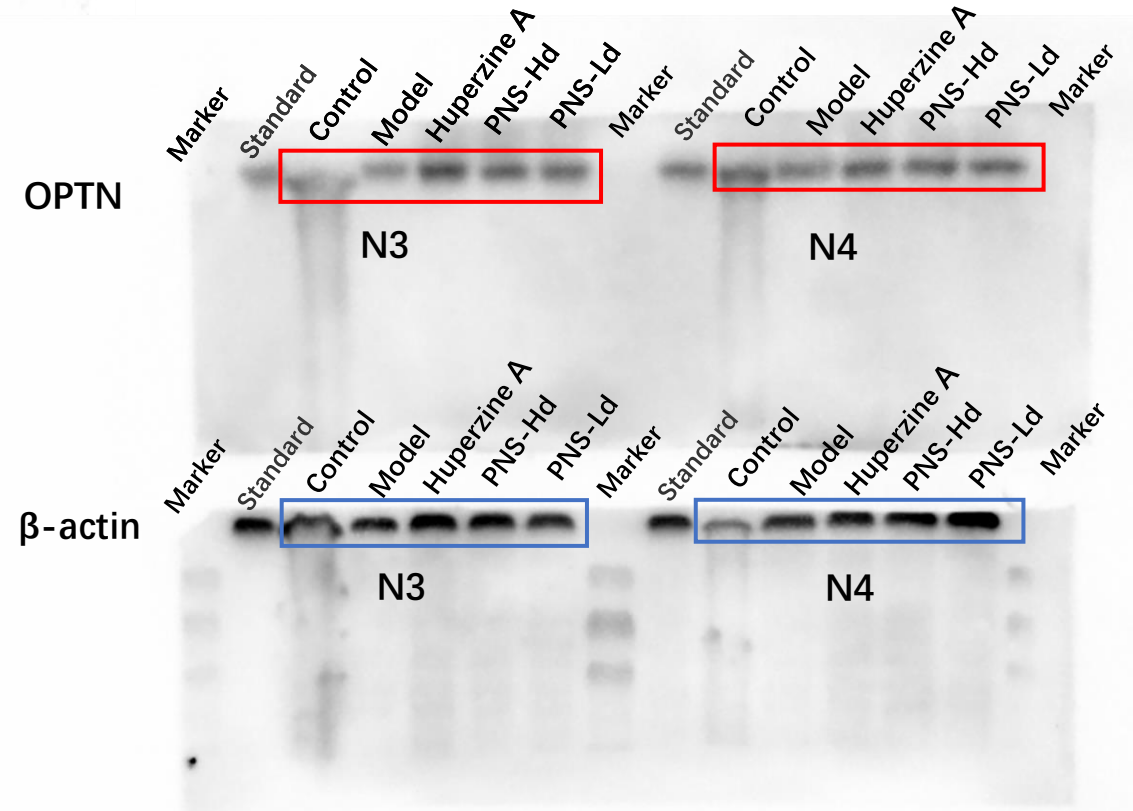

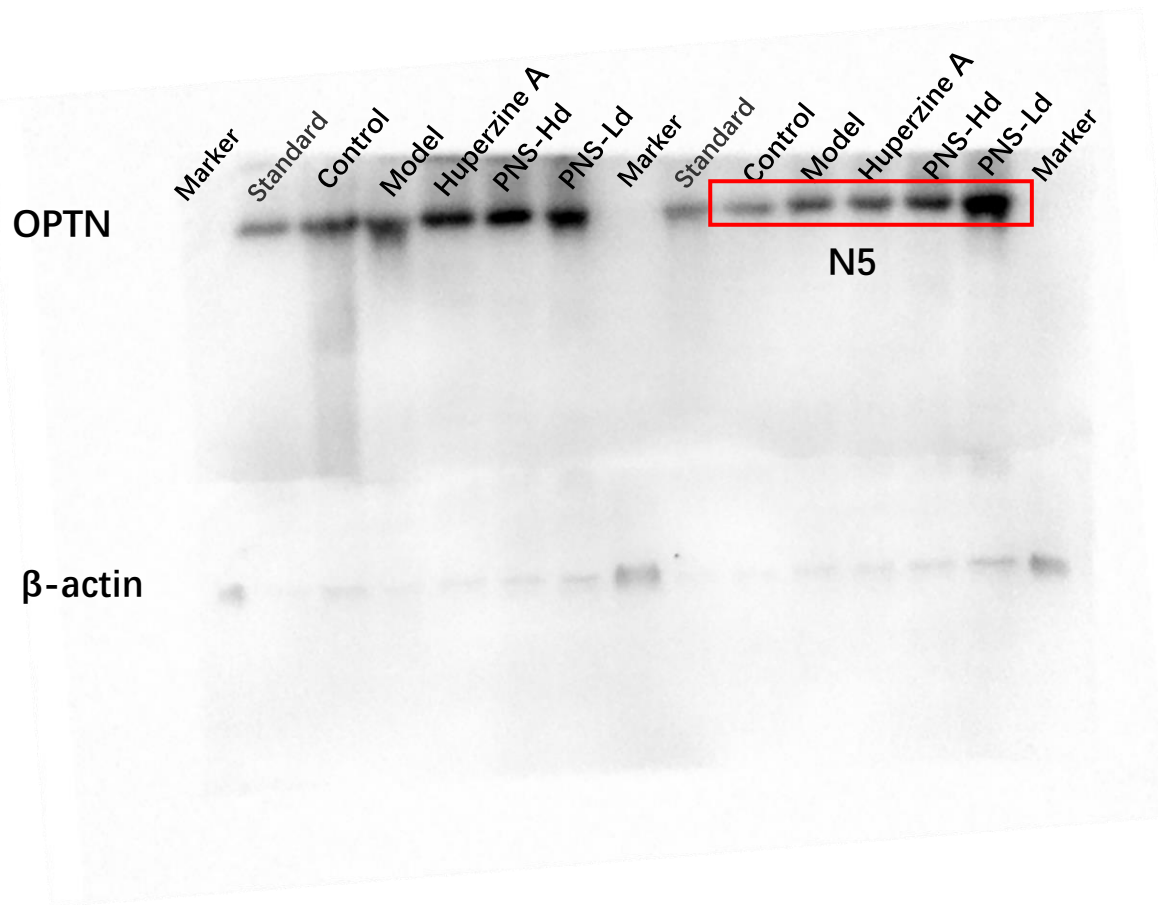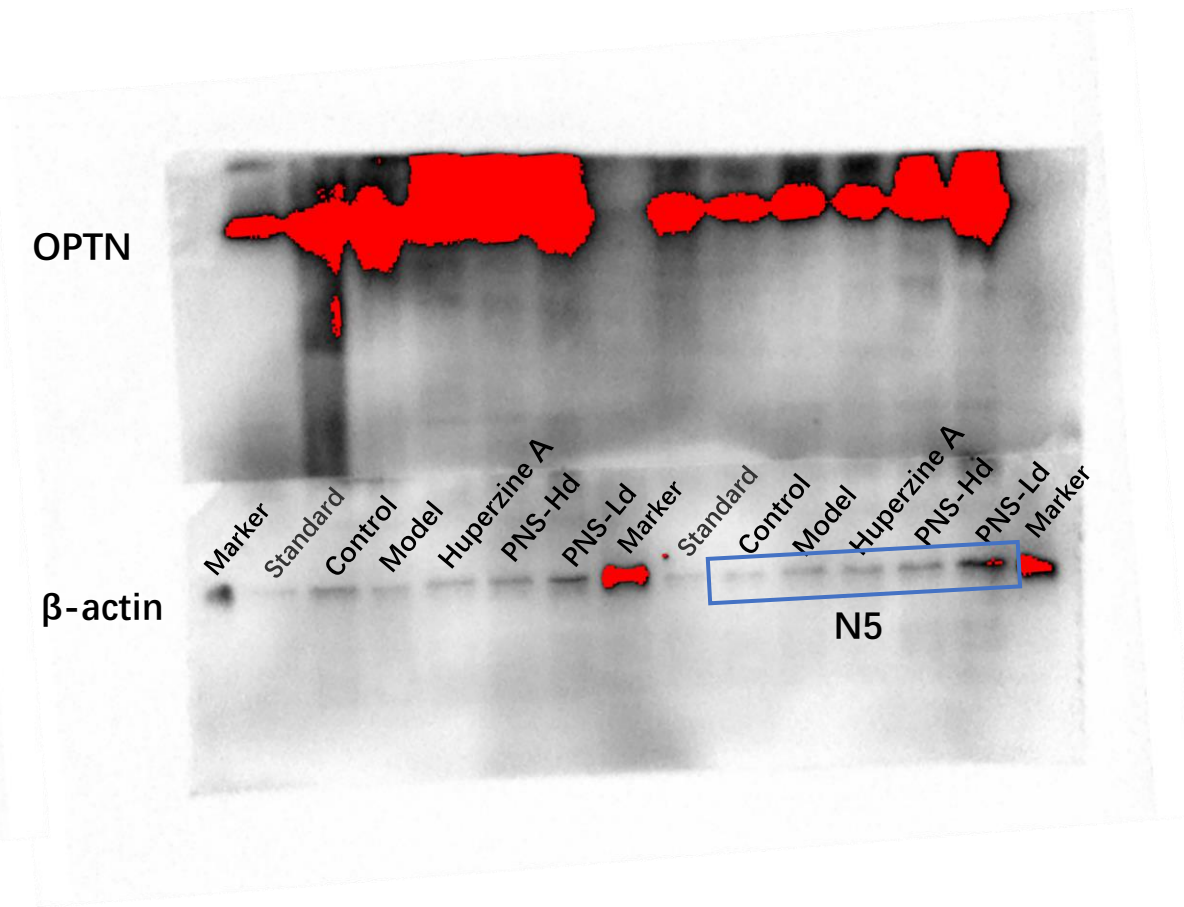

NDP52

Raw Picture in Fig. 4E, the blue and red box position indicates the cutting position and both blots were running on the same gel.

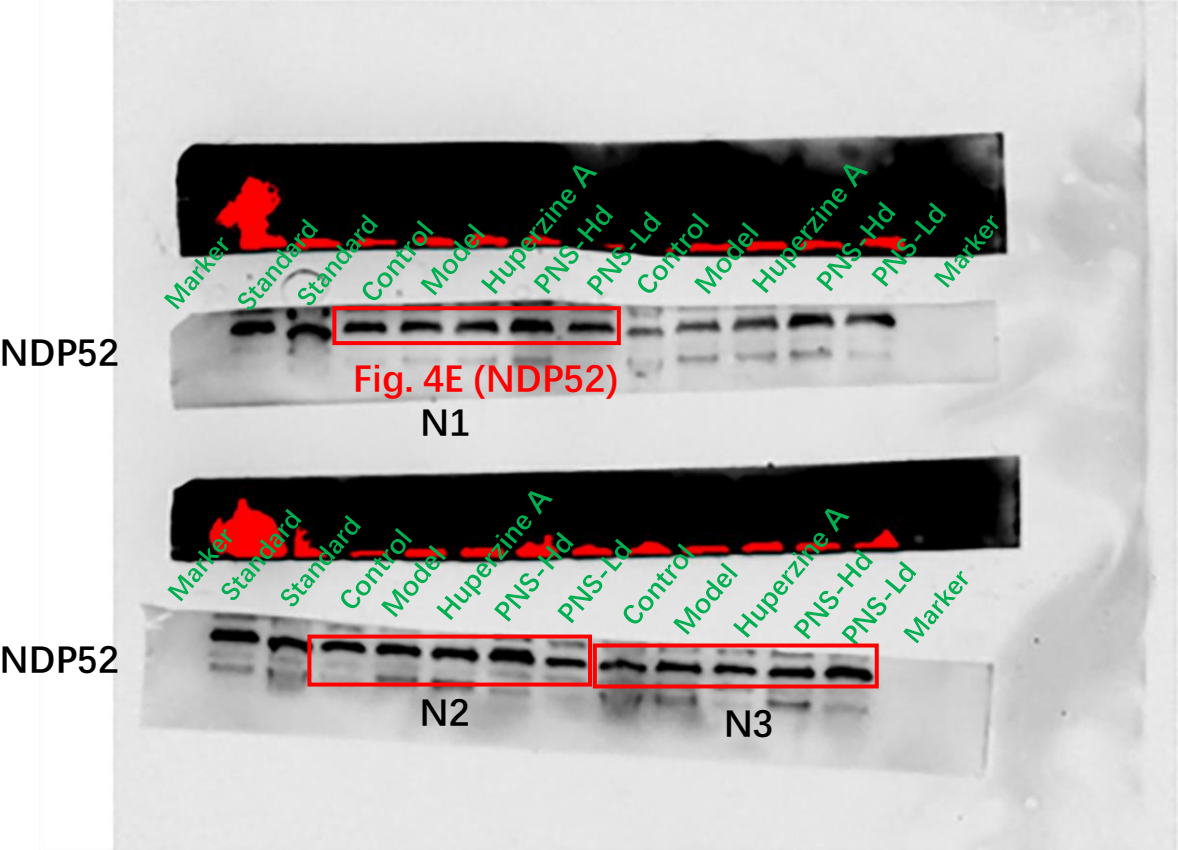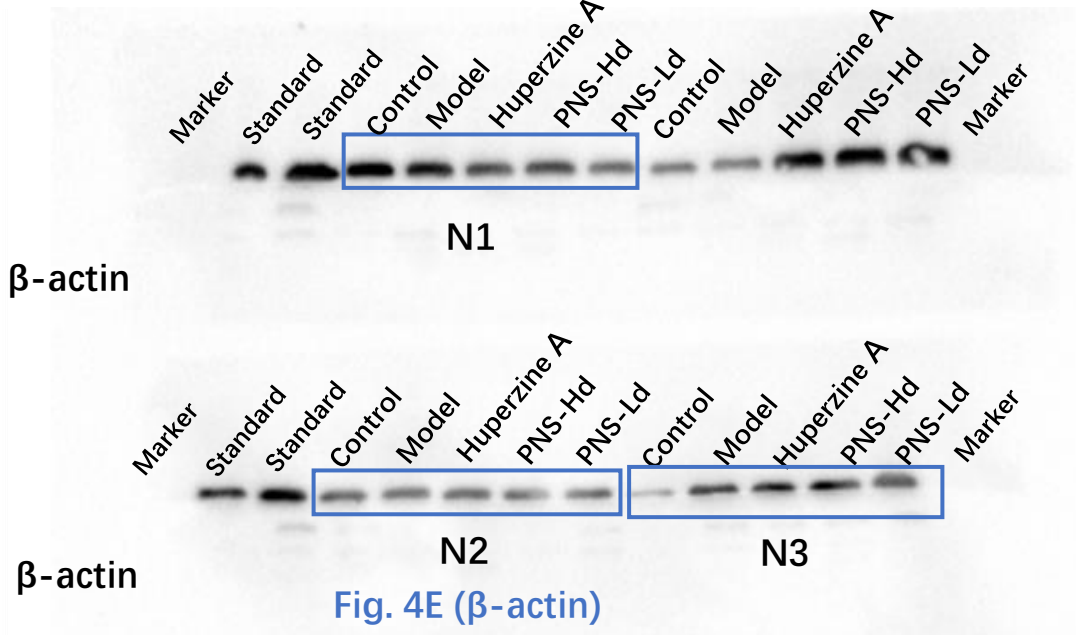

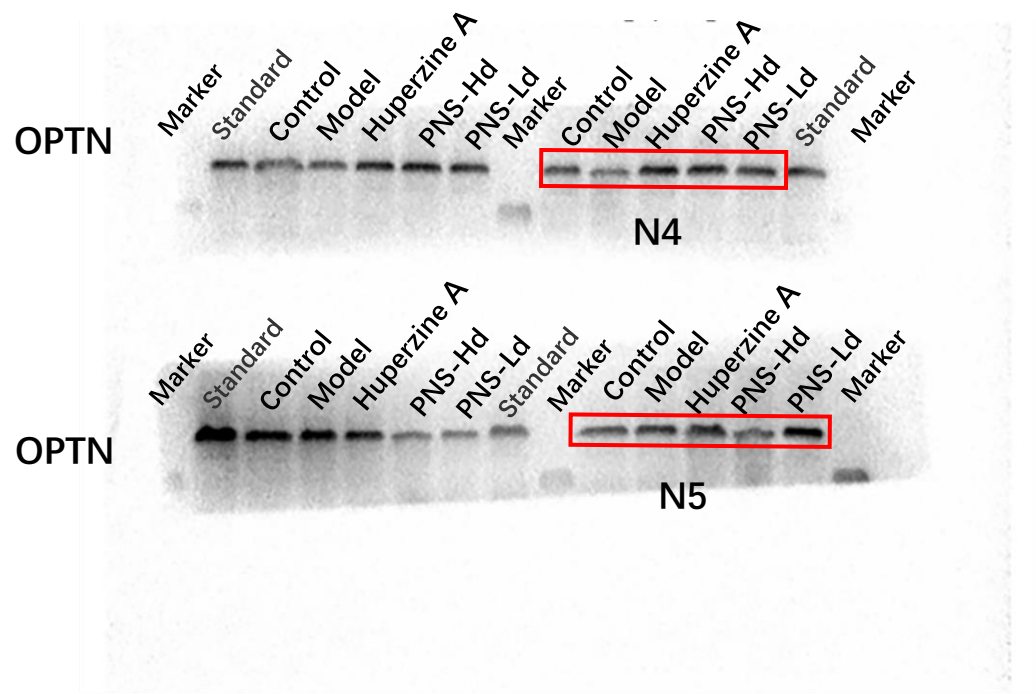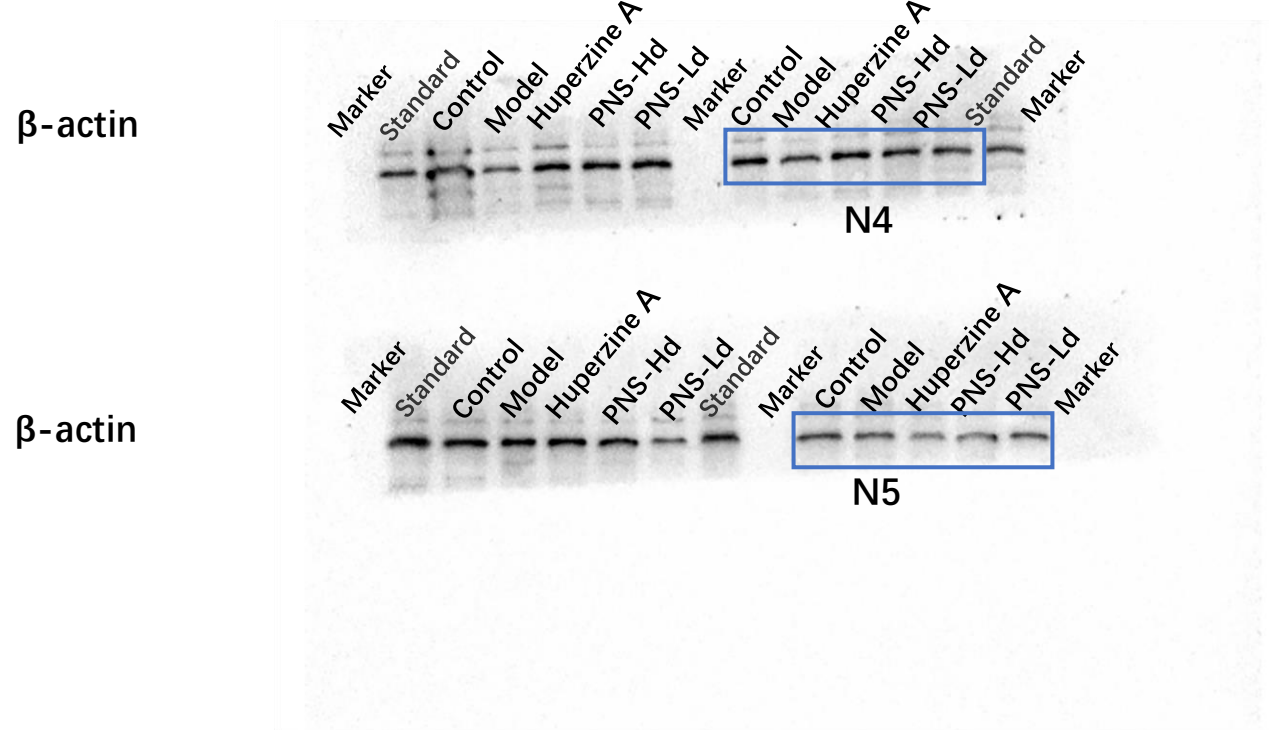

Supplement: 12906_2024_4403_MOESM1_ESM.pdf [file 12906_2024_4403_MOESM1_ESM.pdf]
